# Supplementary material for: A pH-induced self-healable shape memory hydrogel with metal-coordination cross-links
Source: Royal Society of Chemistry journal article supplement (doi:10.1039/c9py00015a), 2019-01-01
Supplement: c9py00015a1.pdf [file c9py00015a1.pdf]

Support Information

# A pH-induced self-healable shape memory hydrogel with metal-coordination cross-links

Liuxuan Lu, <sup>‡a</sup> Tian Tian, <sup>‡a</sup> Shanshan Wu,<sup>a</sup> Tao Xiang<sup>\*a</sup> and Shaobing Zhou<sup>\*a</sup>

Key Laboratory of Advanced Technologies of Materials, Ministry of Education, School of Materials Science and Engineering, Southwest Jiaotong University, Chengdu 610031, China

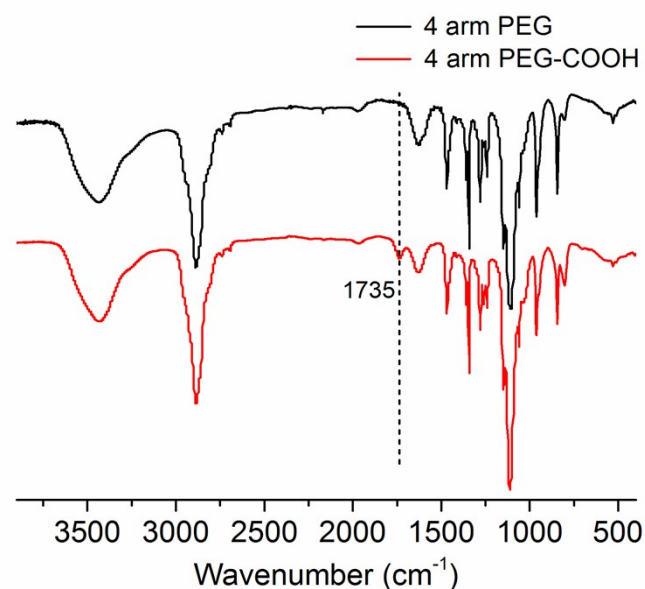

**Figure S1.** FT-IR spectra of 4 arm PEG and 4 arm PEG-COOH.

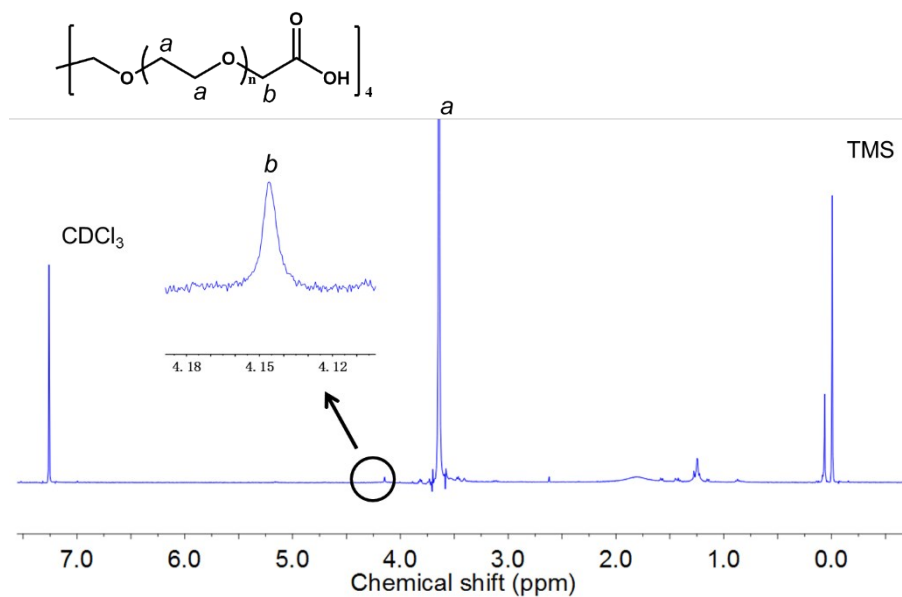

**Figure S2.** <sup>1</sup>H NMR spectrum of 4 arm PEG-COOH in CDCl<sub>3</sub>.

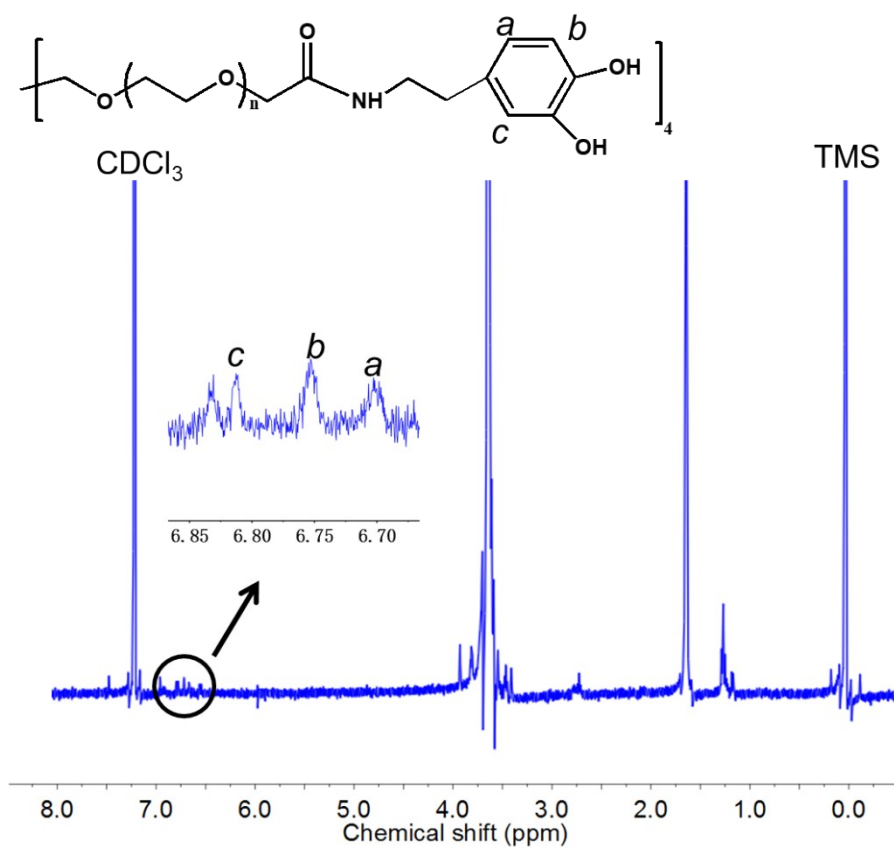

**Figure S3.** <sup>1</sup>H NMR spectrum of 4 arm PEG-DA in CDCl<sub>3</sub>.

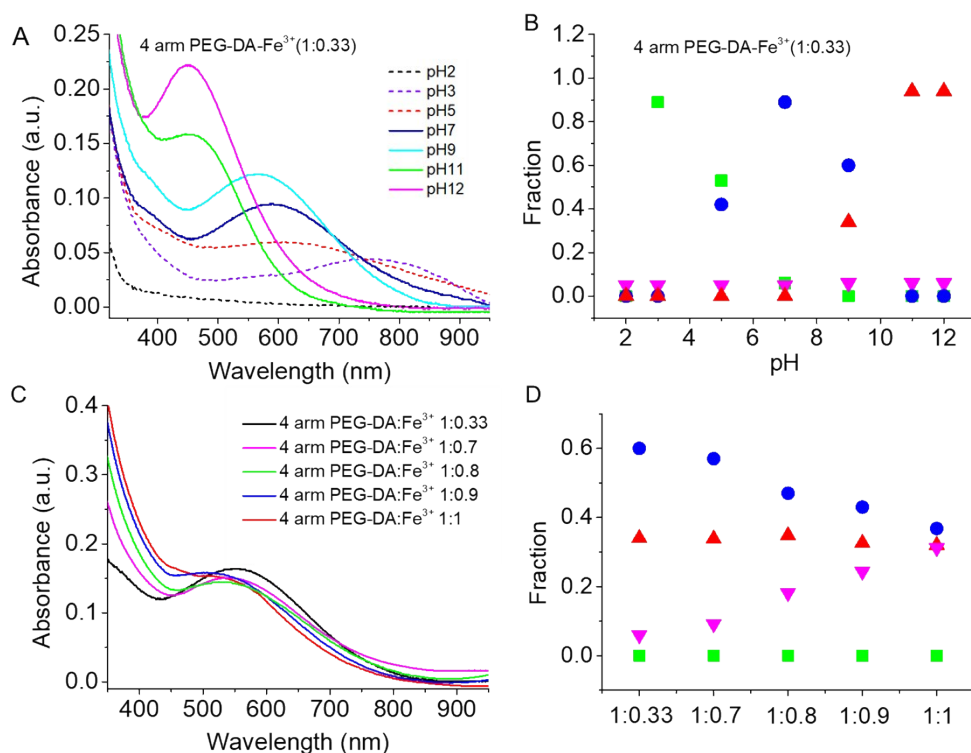

**Figure S4.** (A) UV-vis spectra of 4 arm PEG-dopa-Fe<sup>3+</sup> solution at pH values of 2, 3, 5, 7, 9, 11 and 12. The concentration of 4 arm PEG-dopa was 2.5 mg/mL and the molar ratio of dopa: Fe<sup>3+</sup> is 1:0.33. Absorption maxima for pure mono-(~751 nm), bis- (~574 nm), and tris-catecholato-Fe<sup>3+</sup> (~498 nm) complexes. (B) The relative fractions of the three catechol-Fe<sup>3+</sup> complexes calculated from the corresponding specific absorbance peaks: mono- (■), bis- (●), and tris-catechol-Fe<sup>3+</sup> (▲) complexes, catechol-catechol covalent bond (▼). (C) UV-vis spectra of 4 arm PEG-dopa-Fe<sup>3+</sup> solution with the Fe<sup>3+</sup>:dopa molar ratio of 1:0.33, 1:0.7, 1:0.8, 1:0.9 and 1:1, respectively. (D) The relative fractions of the three catechol-Fe<sup>3+</sup> complexes calculated from the corresponding specific absorbance peaks: mono- (■), bis- (●), and tris-catechol-Fe<sup>3+</sup> (▲) complexes, catechol-catechol covalent bond (▼).

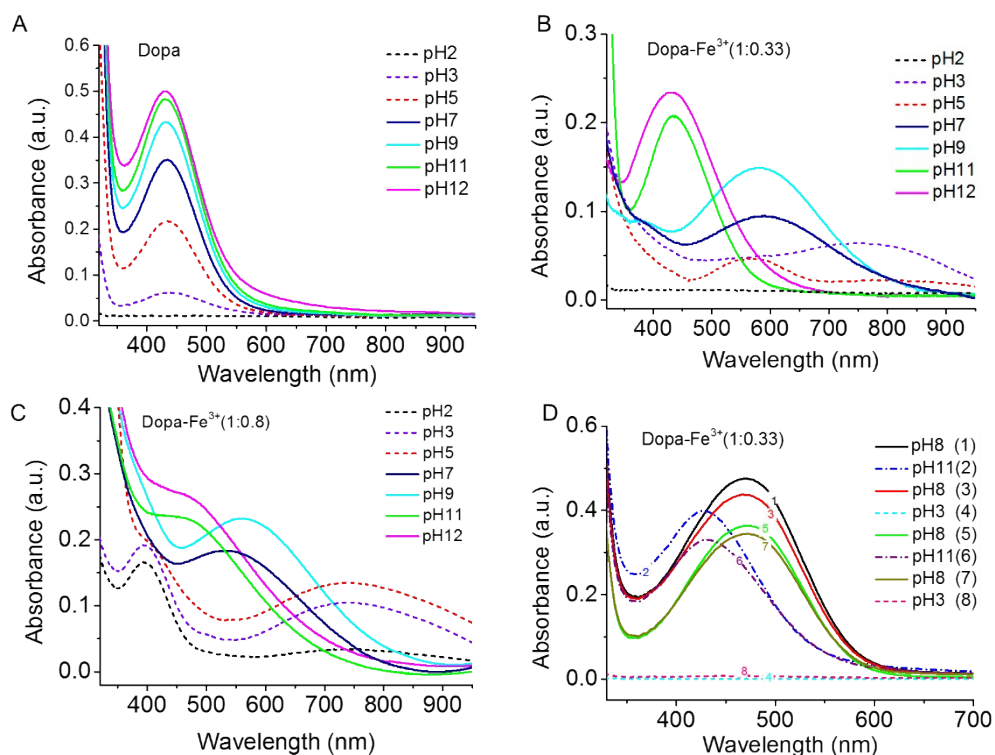

**Figure S5.** UV-vis spectra of dopa solution (A) and dopa-Fe<sup>3+</sup> solution (B) at pH values of 2, 3, 5, 7, 9, 11 and 12. The concentration of dopa solution was 0.01 mg/mL and the dopa: Fe<sup>3+</sup> molar ratio was 3:1. Absorption maxima for pure mono-(~751 nm), bis-(~574 nm), and tris-catechol-Fe<sup>3+</sup> (~498 nm) complexes. (C) UV-vis spectra of dopa-Fe<sup>3+</sup> solution with the dopa: Fe<sup>3+</sup> molar ratio of 1:0.8 at pH values of 2, 3, 5, 7, 9, 11 and 12. Absorption maxima for pure mono-(~751nm), bis- (~574 nm), and tris-catechol-Fe<sup>3+</sup> (~498 nm) complexes, catechol-catechol covalent bond (~400 nm). (D) The UV-vis spectra of dopa-Fe<sup>3+</sup> solution, in which the bis- (~574 nm), and tris-catechol-Fe<sup>3+</sup> (~498 nm) complexes alternately change with cyclically changing pH value.

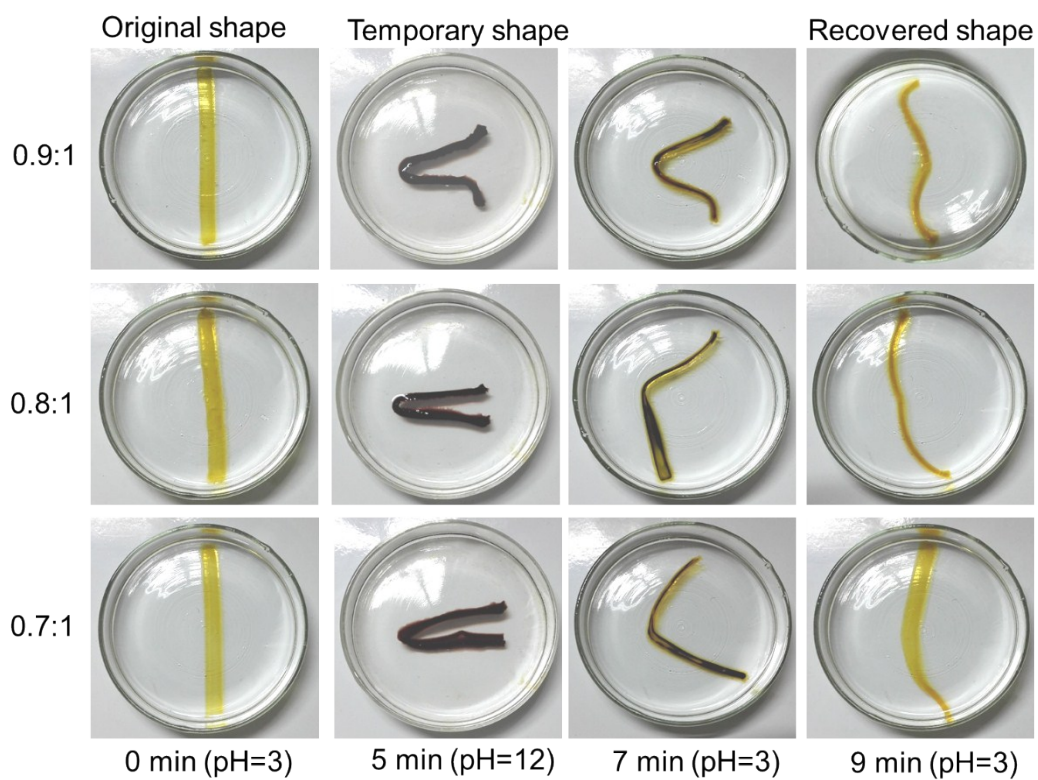

**Figure S6.** The photographs showing shape-memory behaviors of 4 arm PEG-dopa- $\text{Fe}^{3+}$  hydrogels with dopa:  $\text{Fe}^{3+}$  molar ratios of 1:0.9, 1:0.8 and 1:0.7.

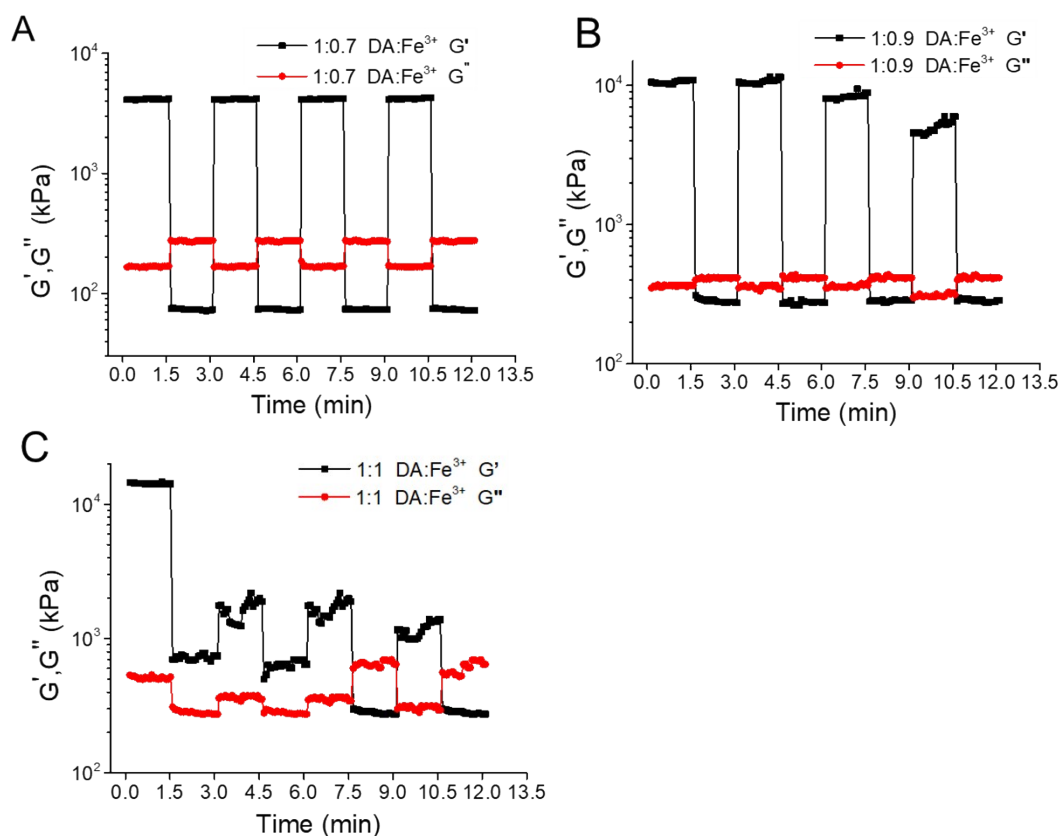

**Figure S7.** The rheological measurements of 4 arm PEG-dopa-Fe<sup>3+</sup> hydrogels with dopa: Fe<sup>3+</sup> molar ratios of 1:0.9 (A), 1:0.8 (B) and 1:0.7 (C), respectively. Alternate switched strains of small strain ( $\gamma = 10.0\%$ ) and large strain ( $\gamma = 3000\%$ ) at a fixed angular frequency (10 rad/s) were used, and each strain interval was kept for 90 s.

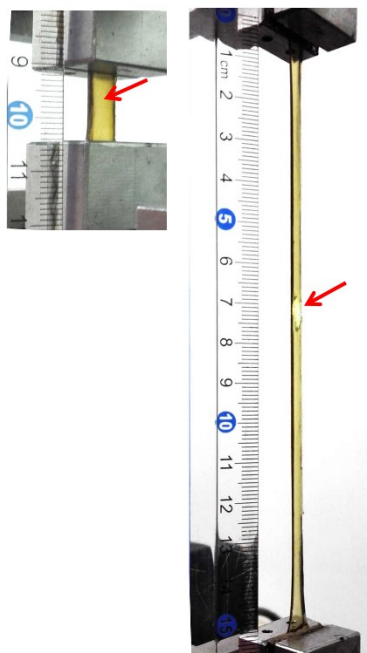

**Figure S8.** The tensile testing of the hydrogel with dopa:  $\text{Fe}^{3+}$  molar ratio of 1:0.8 after self-healing.

**Table S1.** The self-healing efficiency of hydrogel with dopa:  $\text{Fe}^{3+}$  molar ratio of 1:0.8 at different pH values after the cut samples contact for 24 hours. The values are mean values of at least 3 tests.

| pH values | Elongation at break |                    | Self-healing efficiency |
|-----------|---------------------|--------------------|-------------------------|
|           | Before cutting      | After self-healing |                         |
| pH=3      | 1575%               | 1340%              | 85.1%                   |
| pH=5      | 1393%               | 1273%              | 91.4%                   |
| pH=7      | 1041%               | 939%               | 90.2%                   |
| pH=9      | 1065%               | 1000%              | 93.8%                   |
| pH=11     | 1310%               | 1237%              | 94.5%                   |
